# Supplementary material for: A Portion of the Apomixis Locus of Paspalum Simplex is Microsyntenic with an Unstable Chromosome Segment Highly Conserved Among Poaceae
Source: PubMed Central journal article supplement (PMC6397161; doi:10.1038/s41598-019-39649-6), 2019-03-01

A PORTION OF THE APOMIXIS LOCUS OF PASPALUM SIMPLEX IS MICROSYPNTENIC WITH AN UNSTABLE CHROMOSOME SEGMENT HIGHLY CONSERVED AMONG POACEAE

Giulio Galla, Lorena A. Siena, Juan Pablo A. Ortiz, Helmut Baumlein, Gianni Barcaccia, Silvina C. Pessino, Michele Bellucci and Fulvio Pupilli

**Figure legends**

**Supplementary Figure S1.** Dot blot of apomixis-linked BACs hybridized with the rice marker c996 as probe.

**Supplementary Figure S2.** *In situ* hybridization analysis of PsACR|H5 (a) and PsACR|H.13 (b-f) transcripts in female reproductive tissues at anthesis of sexual and apomictic *P. simplex*. Sections of sexual (b and c) and apomictic (d) ovules hybridized with antisense probes (detecting the sense transcripts); sections of sexual (a and e) and apomictic (f) ovules hybridized with the sense probes. an = antipodal cells, ec = egg cell, n = nucellus and pn = polar nuclei. Bar = 50  $\mu$ m.

**Uncropped Supplementary Figure S1.** Uncropped blot image of Supplementary Figure S1

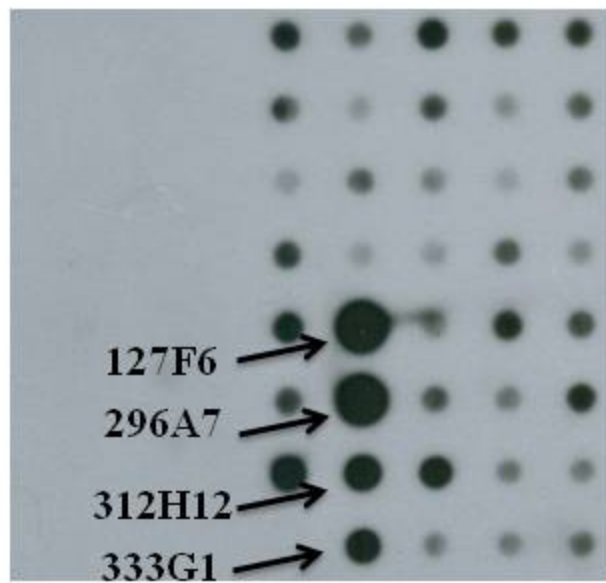

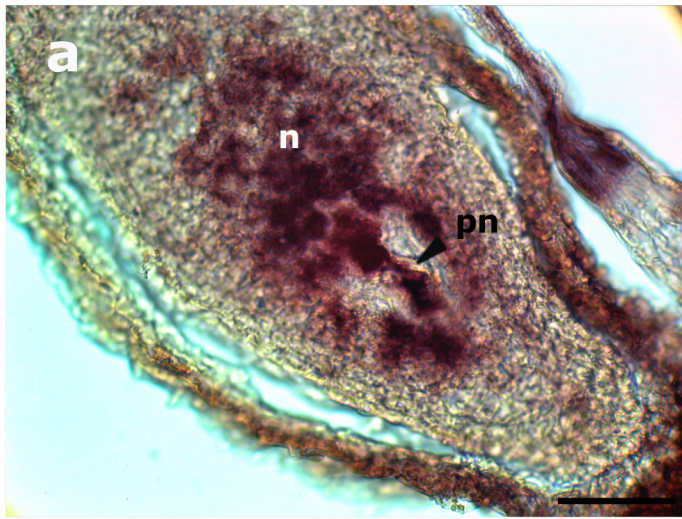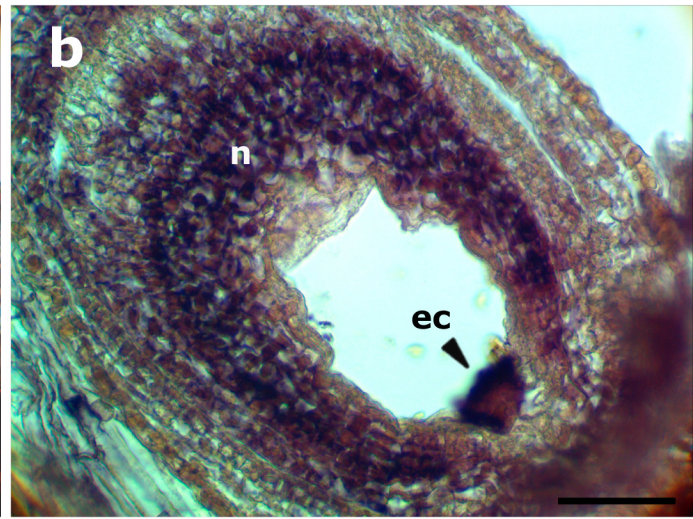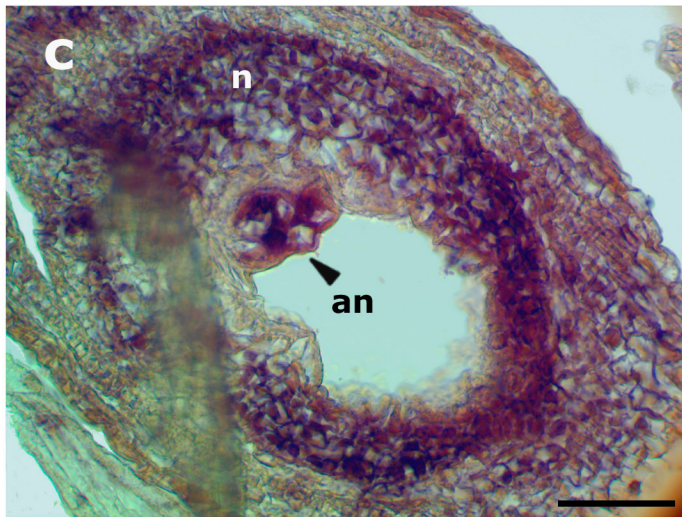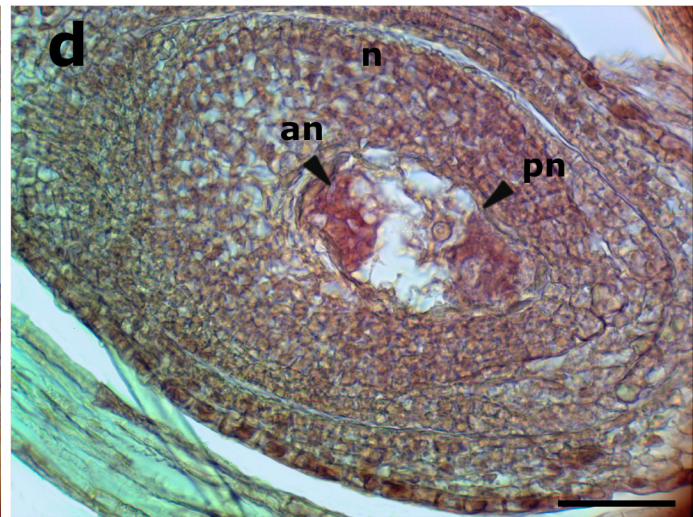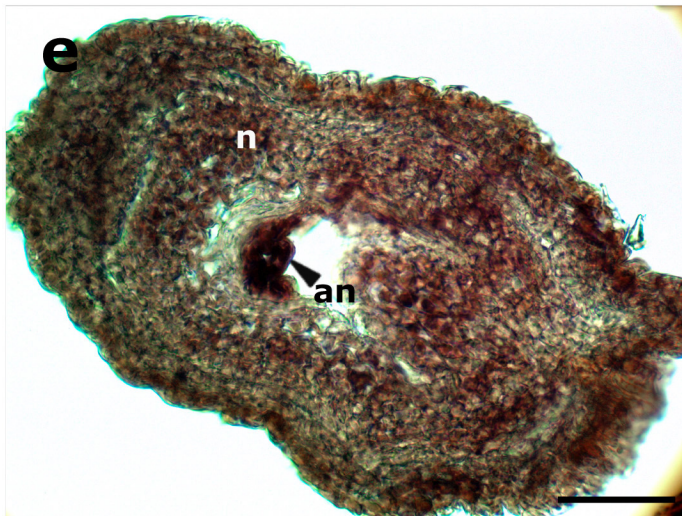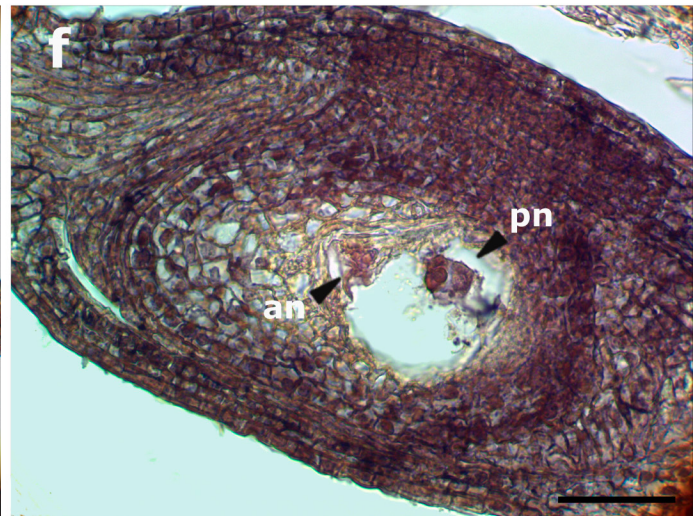



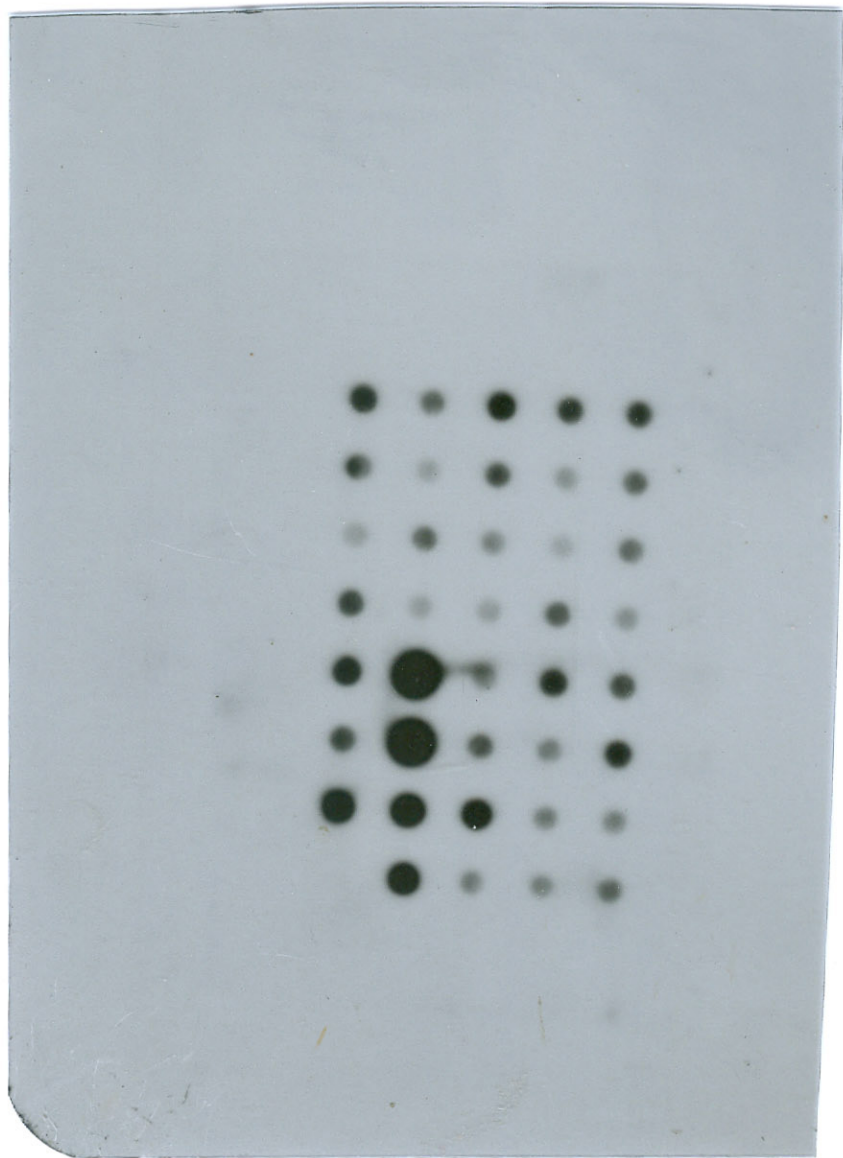

Supplement: 41598_2019_39649_MOESM1_ESM.pdf [file 41598_2019_39649_MOESM1_ESM.pdf]
